# Supplementary material for: An accelerated mouse model for atherosclerosis and adipose tissue inflammation
Source: PubMed Central journal article supplement (PMC3902066; doi:10.1186/1475-2840-13-23), 2014-01-17
Supplement: 1475-2840-13-23-S3.pdf [file 1475-2840-13-23-S3.pdf]

## Additional Figure 4

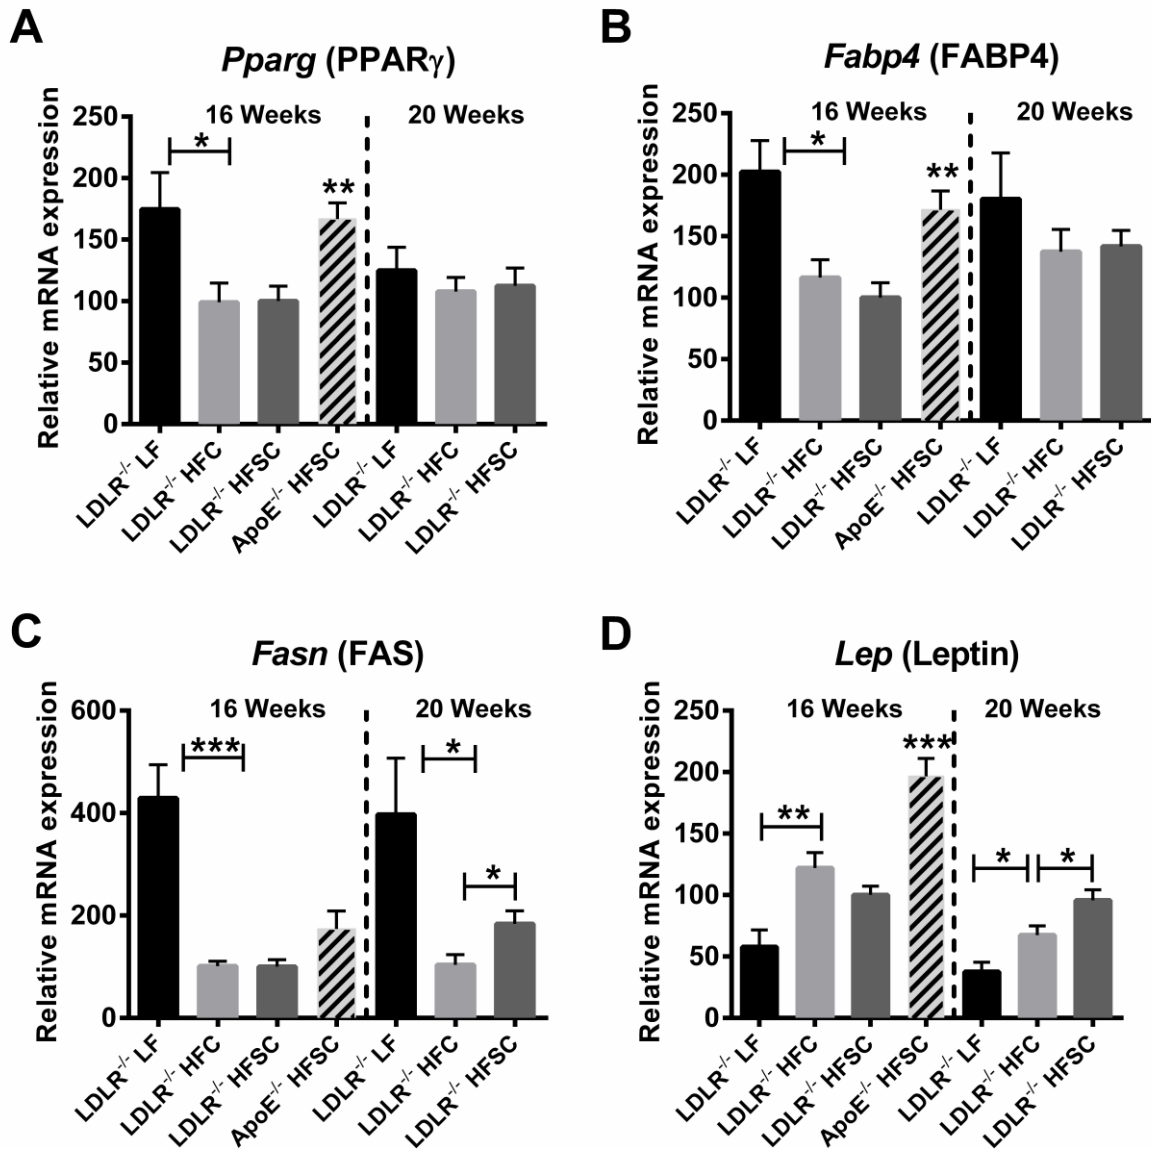

**Additional Figure 4:** LDLR<sup>-/-</sup> mice were fed HFSC, HFC or LF for 16 weeks or 20 weeks ( $n = 6$  animals per group). ApoE<sup>-/-</sup> mice were fed HFSC for 16 weeks ( $n = 8$  animals per group). Gonadal adipose tissue expression of the genes for PPAR $\gamma$  (*Pparg*) (A), FABP4 (*Fabp4*) (B), and fatty acid synthase (FAS; *Fasn*) (C), and Leptin (*Lep*) (D) was determined by real-time RT-PCR. For statistical analysis LDLR<sup>-/-</sup> mice fed HFSC or LF were compared with HFC-fed LDLR<sup>-/-</sup> mice. In addition, LDLR<sup>-/-</sup> and ApoE<sup>-/-</sup> mice both fed HFSC were compared. All data represent mean  $\pm$  SEM. \* $P < 0.05$ , \*\* $P < 0.01$ , \*\*\* $P < 0.001$
